# Supplementary material
Source: PubMed Central journal article supplement (PMC6534166)

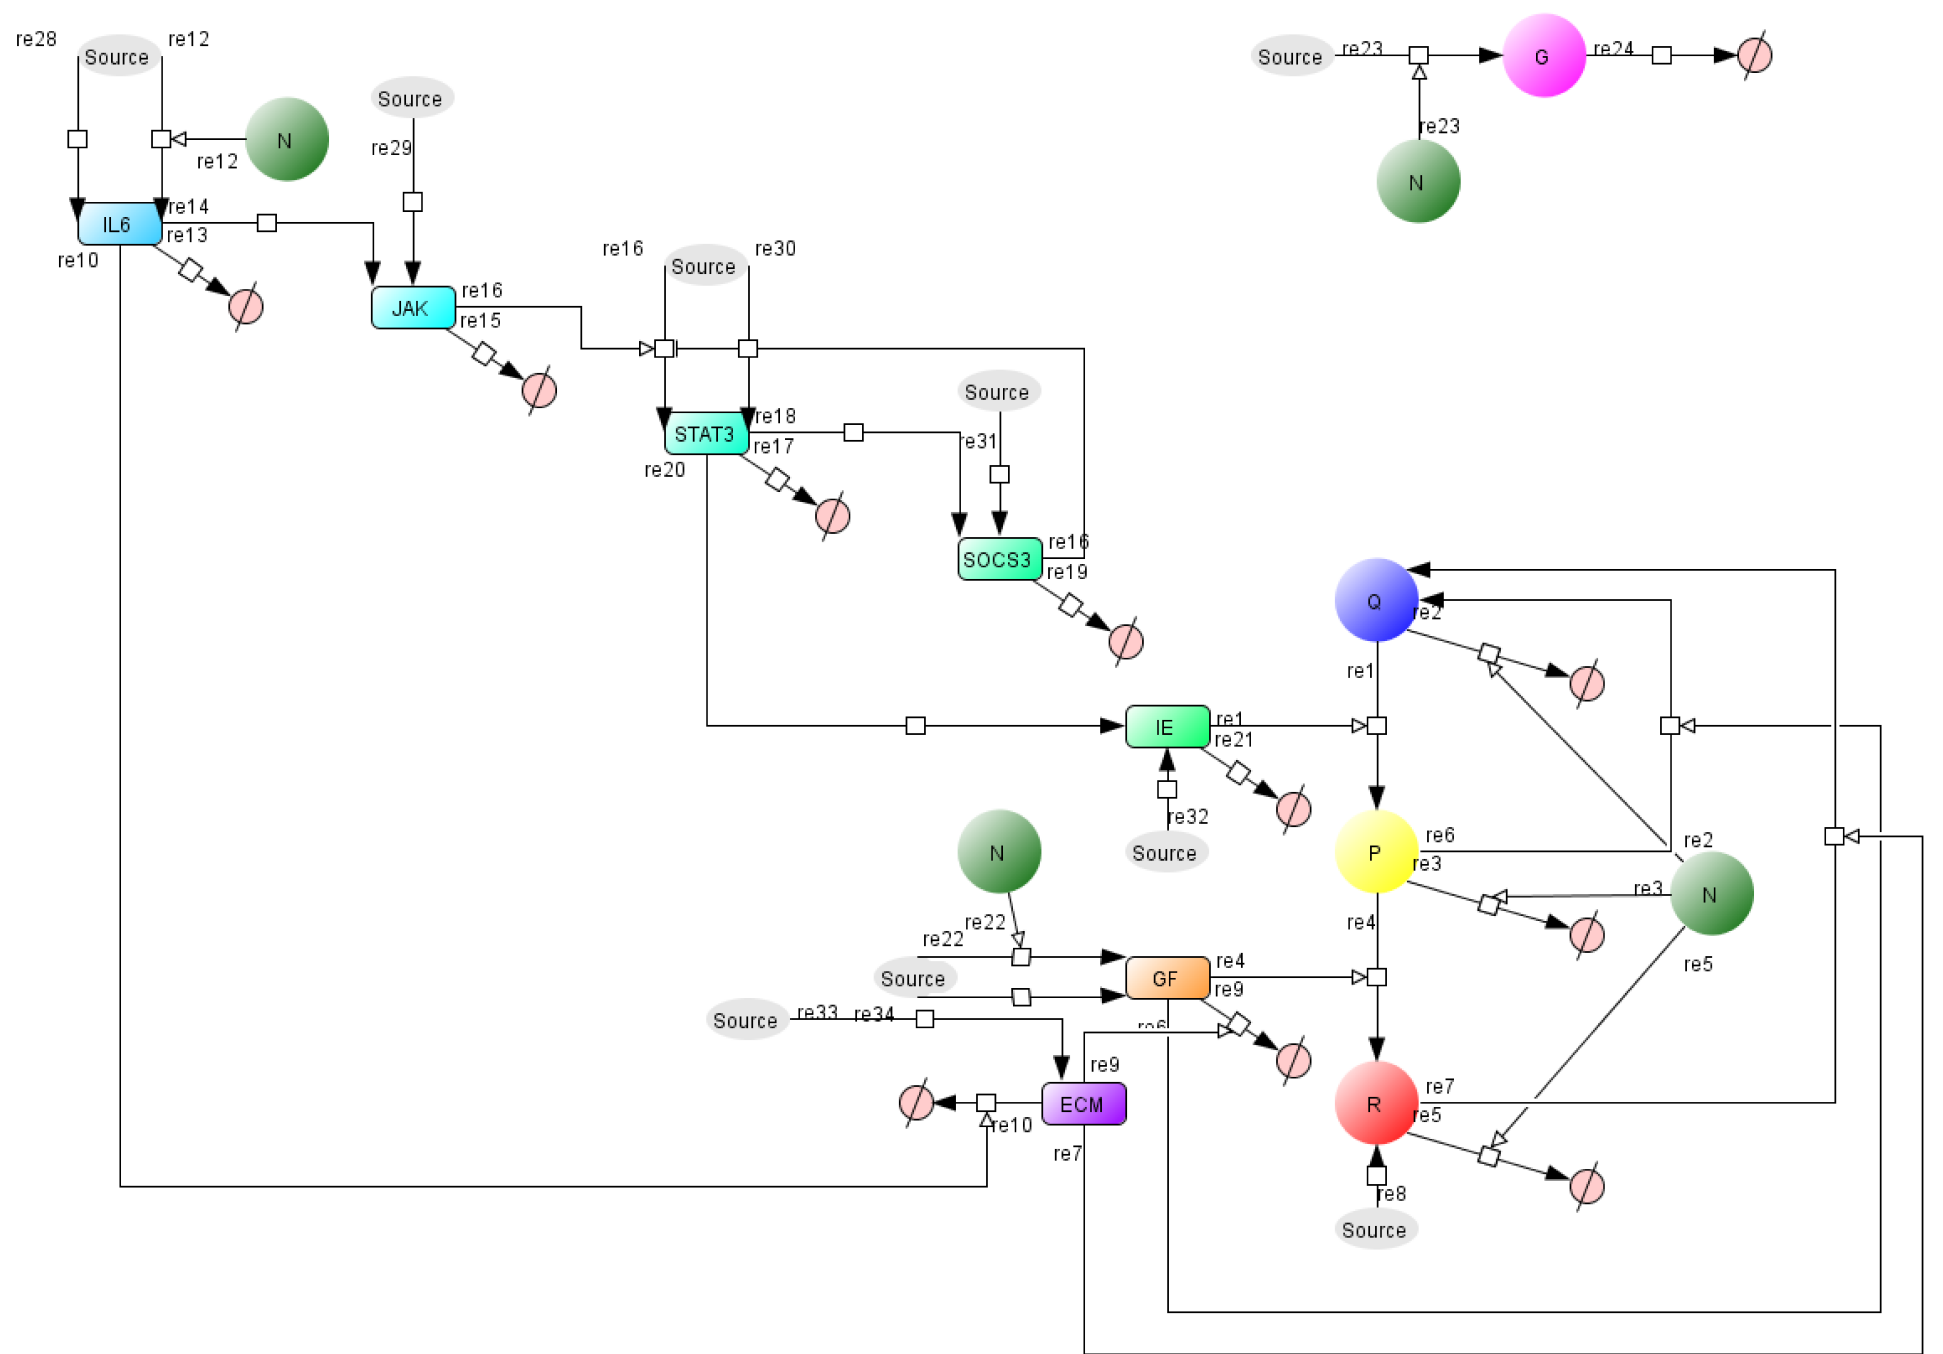

Supplement: NIHMS1026512-supplement-Figure_S1.pdf [file NIHMS1026512-supplement-Figure_S1.pdf]
